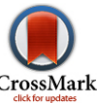

## Correction

# Correction: A Room with a Viewpoint Revisited: Descriptive Norms and Hotel Guests' Towel Reuse Behavior

The *PLOS ONE* Staff

## Notice of Republication

This article was republished on August 6, 2014, to replace chi and phi characters that were changed in the paper. The publisher apologizes for the errors. Please download this article again to view the correct version. The originally published, uncorrected article and the republished, corrected article are provided here for reference.

## Supporting Information

**File S1.** Originally published, uncorrected article.  
(PDF)

**File S2.** Republished, corrected article.  
(PDF)

## Reference

1. Bohner G, Schlüter LE (2014) A Room with a Viewpoint Revisited: Descriptive Norms and Hotel Guests' Towel Reuse Behavior. *PLoS ONE* 9(8): e104086. doi:10.1371/journal.pone.0104086

**Citation:** The *PLOS ONE* Staff (2014) Correction: A Room with a Viewpoint Revisited: Descriptive Norms and Hotel Guests' Towel Reuse Behavior. *PLoS ONE* 9(8): e106606. doi:10.1371/journal.pone.0106606

**Published:** August 20, 2014

**Copyright:** © 2014 The *PLOS ONE* Staff. This is an open-access article distributed under the terms of the Creative Commons Attribution License, which permits unrestricted use, distribution, and reproduction in any medium, provided the original author and source are credited.
